# Supplementary material
Source: PubMed Central journal article supplement (PMC5537057)
Supplement: NIHMS872124-supplement-supplemental_table.pdf [file NIHMS872124-supplement-supplemental_table.pdf]

Supplemental Table 1

Descriptive Statistics for Study Variables

Mean age at T1 14.8 years (SD 0.7)

Mean age at T2 15.8 years (SD 0.9)

| <u>Grade in school</u> | <u>%</u> |
|------------------------|----------|
| 9 <sup>th</sup> grade  | 49%      |
| 10 <sup>th</sup> grade | 42%      |
| 11 <sup>th</sup> grade | 9%       |

| <u>Gender</u> |     |
|---------------|-----|
| Female        | 57% |
| Male          | 43% |

| <u>Ethnicity</u>  |     |
|-------------------|-----|
| Asian-American    | 34% |
| Caucasian         | 17% |
| Filipino-American | 25% |
| NHPI              | 17% |
| Other             | 7%  |

| <u>Family structure</u> |     |
|-------------------------|-----|
| Single parent           | 15% |
| Stepparent family       | 9%  |
| Two biological parents  | 66% |
| Extended family         | 10% |

| <u>Father's education</u> |     |
|---------------------------|-----|
| Grade school              | <1% |
| Some high school          | 4%  |
| High school graduate      | 25% |
| 1-2 years college         | 16% |
| College graduate          | 42% |
| Post-college              | 13% |

|                   | <u>Range</u> | <u>M</u> | <u>SD</u> | <u>Skewness</u> |
|-------------------|--------------|----------|-----------|-----------------|
| Rebelliousness    | 4-20         | 6.48     | 3.05      | 1.57            |
| Parental support  | 7-35         | 25.98    | 6.91      | -0.72           |
| Willingness smoke | 3-15         | 3.28     | 0.86      | 3.97            |

Note: Descriptives are for longitudinal sample. NHPI = Native Hawaiian/Pacific Islander.
